# Supplementary material
Source: Research Square preprint supplement (doi:10.21203/rs.3.rs-9849675/v1)
Supplement: Supplementary file 1 [file 42373b37a2d385d32f83b185.docx]

# **Supplementary Information**

Online Resource 1. PRISMA 2020 Checklist (PDF).

Online Resource 2. Full search strategies for each database (PDF).

Online Resource 3. PRISMA 2020 flow diagram (PDF).
